# Supplementary material for: The fitness cost of mismatch repair mutators in Saccharomyces cerevisiae: partitioning the mutational load
Source: bioRxiv or medRxiv preprint supplement (doi:10.1101/639765), 2020-03-16
Supplement: Supplementary file [file media-1.pdf]

# Supplemental Figures and Tables

## Supplemental Figures

**Figure S1**

Four replicate fluctuation tests, using resistance to 5-fluoroorotic acid, show an average fold increase of 20.8 (95% CI: 13.4 to 28.3) for the *mmr* strain.

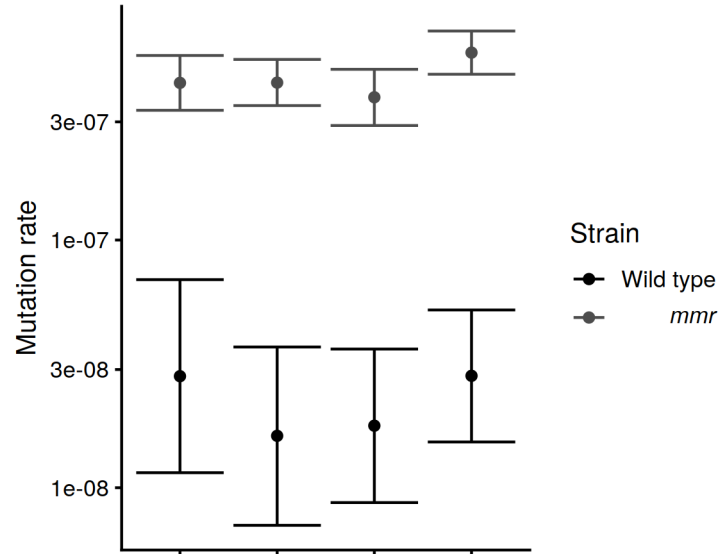

**Figure S2**

Histogram and QQ plot of fitness distributions for diploid strains. Panel **A** shows the results for the wild-type (n=279) strain and panel **B** for the *mmr* strain (n=294). As in Figure 3, the dashed line indicates the mean. The high fitness diploid *mmr* clone shaded in gray was removed from the data set for load calculations and is not shown on the histogram. Removal does not affect the calculation of the load, 0.3%, given rounding.

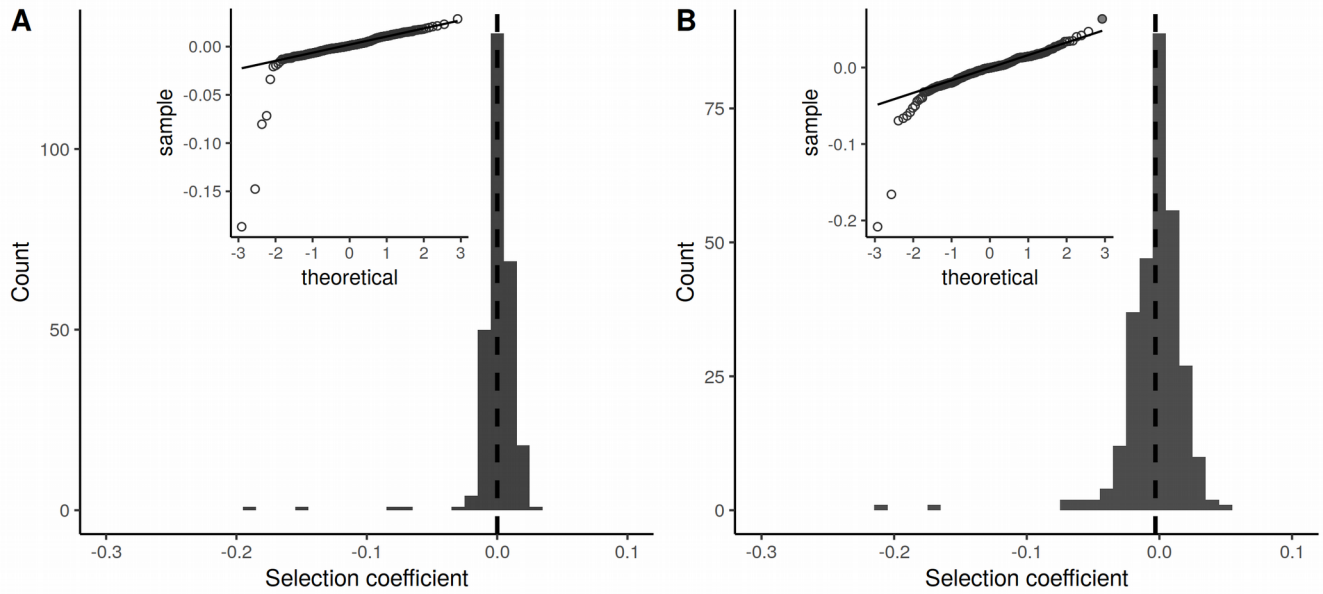

**Figure S3**

Photographs of two lethal events. Top: daughter is lethal, photo taken 27 hours after separation. Bottom: mother is lethal, photo taken 29 hours after separation. Scale bar is ~40 microns.

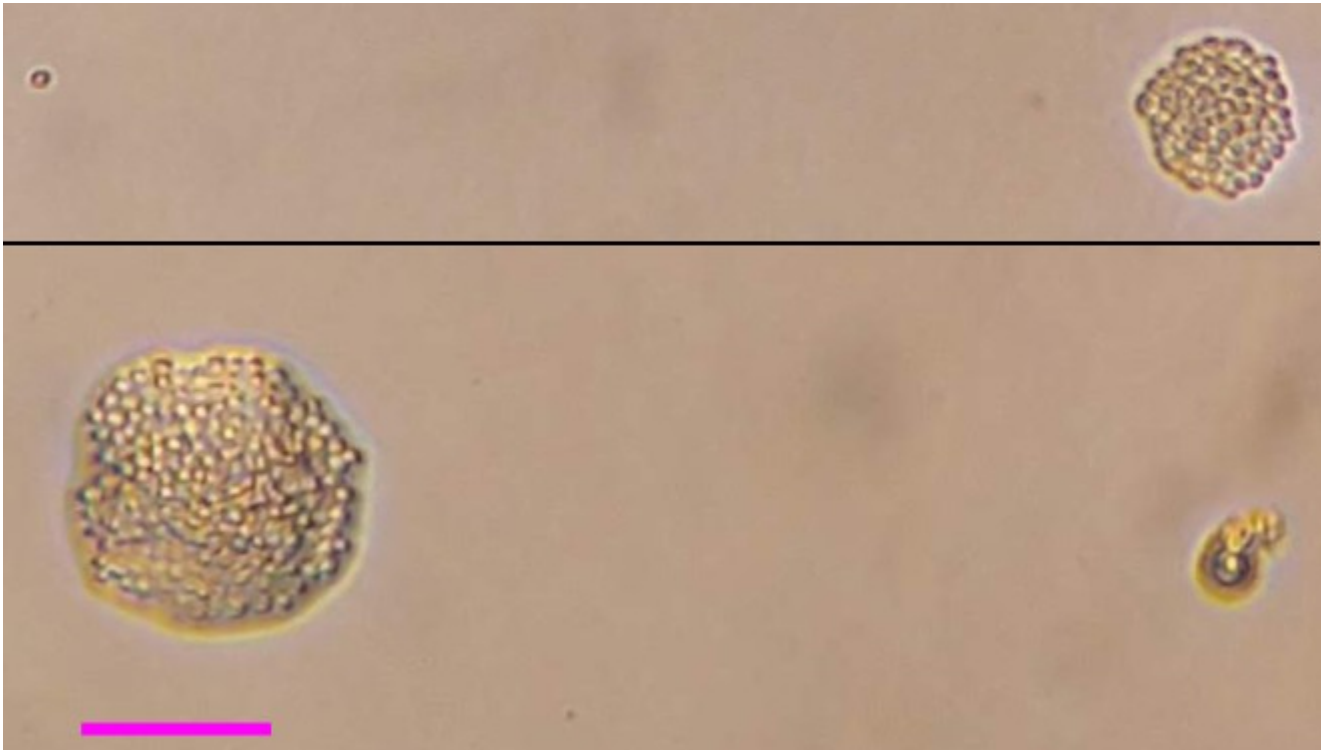

## Supplemental Tables

**Table S1:** Lethal events by mother/daughter.

|          | Wild type | <i>mmr</i> | Total |
|----------|-----------|------------|-------|
| Mother   | 8         | 10         | 18    |
| Daughter | 6         | 23         | 29    |

**Table S2:** Lethal events by final microcolony size.

| Final size (number of cells) | Number |
|------------------------------|--------|
| 1-2                          | 15     |
| 3-30                         | 25     |
| 31-100                       | 3      |
| 100+                         | 4      |
| Total                        | 47     |

**Table S3:** Lethal events by strain, size, and mother/daughter.

| <b>Wild-type</b> |        |          |       |
|------------------|--------|----------|-------|
| Final size       | Mother | Daughter | Total |
| 1-2              | 4      | 4        | 8     |
| 3-30             | 4      | 2        | 6     |
| 31-100           | 0      | 0        | 0     |
| 100+             | 0      | 0        | 0     |
| Total            | 8      | 6        | 14    |

  

| <b><i>mmr</i></b> |        |          |       |
|-------------------|--------|----------|-------|
| Final size        | Mother | Daughter | Total |
| 1-2               | 1      | 6        | 7     |
| 3-30              | 7      | 12       | 19    |
| 31-100            | 1      | 2        | 3     |
| 100+              | 1      | 3        | 4     |
| Total             | 10     | 23       | 33    |

**Table S4:** Collected canavanine fluctuation tests for *S. cerevisiae*.

| Author and year        | Strain | Locus | Genotype    | Rate    | Fold increase |
|------------------------|--------|-------|-------------|---------|---------------|
| Lang & Murray 2008     | W303   | CAN1  | WT          | 1.5E-07 | n/a           |
| Zeyl & de Visser 2001  | Y55    | CAN1  | WT          | 3.2E-07 |               |
| Zeyl & de Visser 2001  | Y55    | CAN1  | <i>msh2</i> | 1.7E-05 | 53            |
| Lang et al 2013        | W303   | CAN1  | WT          | 8.0E-07 |               |
| Lang et al 2013        | W303   | CAN1  | <i>msh2</i> | 6.7E-06 | 8             |
| Gammie et al 2007      | W303   | CAN1  | WT          | 4.8E-07 |               |
| Gammie et al 2007      | W303   | CAN1  | <i>msh2</i> | 1.5E-05 | 31            |
| Reenan & Kolodner 1992 | SK1    | CAN1  | WT          | 4.0E-07 |               |
| Reenan & Kolodner 1992 | SK1    | CAN1  | <i>msh2</i> | 3.4E-05 | 85            |
| Marsischky et al 1996  | MGD    | CAN1  | WT          | 1.0E-07 |               |
| Marsischky et al 1996  | MGD    | CAN1  | <i>msh2</i> | 4.0E-06 | 40            |
| Average of above       |        | CAN1  | WT          | 3.8E-07 |               |
| Average of above       |        | CAN1  | <i>msh2</i> | 1.5E-05 | 44            |

**Table S5:** Homopolymer occurrence in coding sequences of *S. cerevisiae* and *E. coli*. p-values are given for the difference in per base rates; “\*\*\*” indicates a p-value of less than  $2.2 \times 10^{-16}$ .**Homopolymeric repeats in coding sequences**

| Repeat length | <i>S. cerevisiae</i> |          |          | <i>E. coli</i> |          |          | <i>S. cerevisiae</i> / <i>E. coli</i> ratio |          |          |         |
|---------------|----------------------|----------|----------|----------------|----------|----------|---------------------------------------------|----------|----------|---------|
|               | Number               | Per gene | Per base | Number         | Per gene | Per base | Per coding genome                           | Per gene | Per base | p-value |
| 3             | 331178               | 57.31    | 4.0E-02  | 141596         | 32.830   | 3.5E-02  | 2.3                                         | 1.7      | 1.2      | ***     |
| 4             | 102058               | 17.66    | 1.2E-02  | 35301          | 8.185    | 8.7E-03  | 2.9                                         | 2.2      | 1.4      | ***     |
| 5             | 31363                | 5.43     | 3.8E-03  | 10895          | 2.526    | 2.7E-03  | 2.9                                         | 2.1      | 1.4      | ***     |
| 6             | 9287                 | 1.61     | 1.1E-03  | 2997           | 0.695    | 7.3E-04  | 3.1                                         | 2.3      | 1.5      | ***     |
| 7             | 3066                 | 0.53     | 3.7E-04  | 564            | 0.131    | 1.4E-04  | 5.4                                         | 4.1      | 2.7      | ***     |
| 8             | 971                  | 0.17     | 1.2E-04  | 97             | 0.022    | 2.4E-05  | 10.0                                        | 7.5      | 5.0      | ***     |
| 9             | 306                  | 0.05     | 3.7E-05  | 9              | 0.002    | 2.2E-06  | 34.0                                        | 25.4     | 17.0     | ***     |
| ≥10           | 214                  | 0.04     | 2.6E-05  | 0              | 0        | 0        | n/a                                         | n/a      | n/a      | ***     |

**References**

Gammie AE, Erdeniz N, Beaver J, Devlin B, Nanji A, Rose MD (2007) Functional Characterization of Pathogenic Human MSH2 Missense Mutations in *Saccharomyces cerevisiae*. *Genetics* 177: 707–721.

Lang GI, Murray AW (2008) Estimating the per-base-pair mutation rate in the yeast *Saccharomyces cerevisiae*. *Genetics* 178: 67–82.

Lang GI, Parsons L, Gammie AE (2013) Mutation rates, spectra, and genome-wide distribution of spontaneous mutations in mismatch repair deficient yeast. *G3: Genes, Genomes, Genetics* 3: 1453–1465.

Marsischky GT, Filosi N, Kane MF, Kolodner R (1996) Redundancy of *Saccharomyces cerevisiae* MSH3 and MSH6 in MSH2-dependent mismatch repair. *Genes Dev* 10: 407–420.

Reenan RA, Kolodner RD (1992) Characterization of insertion mutations in the *Saccharomyces cerevisiae* MSH1 and MSH2 genes: Evidence for separate mitochondrial and nuclear functions. *Genetics* 132: 975–985.

Zeyl C, DeVisser JAGM (2001) Estimates of the Rate and Distribution of Fitness Effects of Spontaneous Mutation in *Saccharomyces cerevisiae*. *Genetics* 157: 53–61.
